# Supplementary material for: Epithelial to Mesenchymal Transition: A Mechanism that Fuels Cancer Radio/Chemoresistance
Source: MDPI journal article supplement (doi:10.3390/cells9020428), 2020-02-12
Supplement: s1 [file s1]

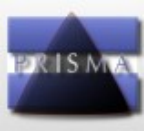

## PRISMA 2009 Flow Diagram

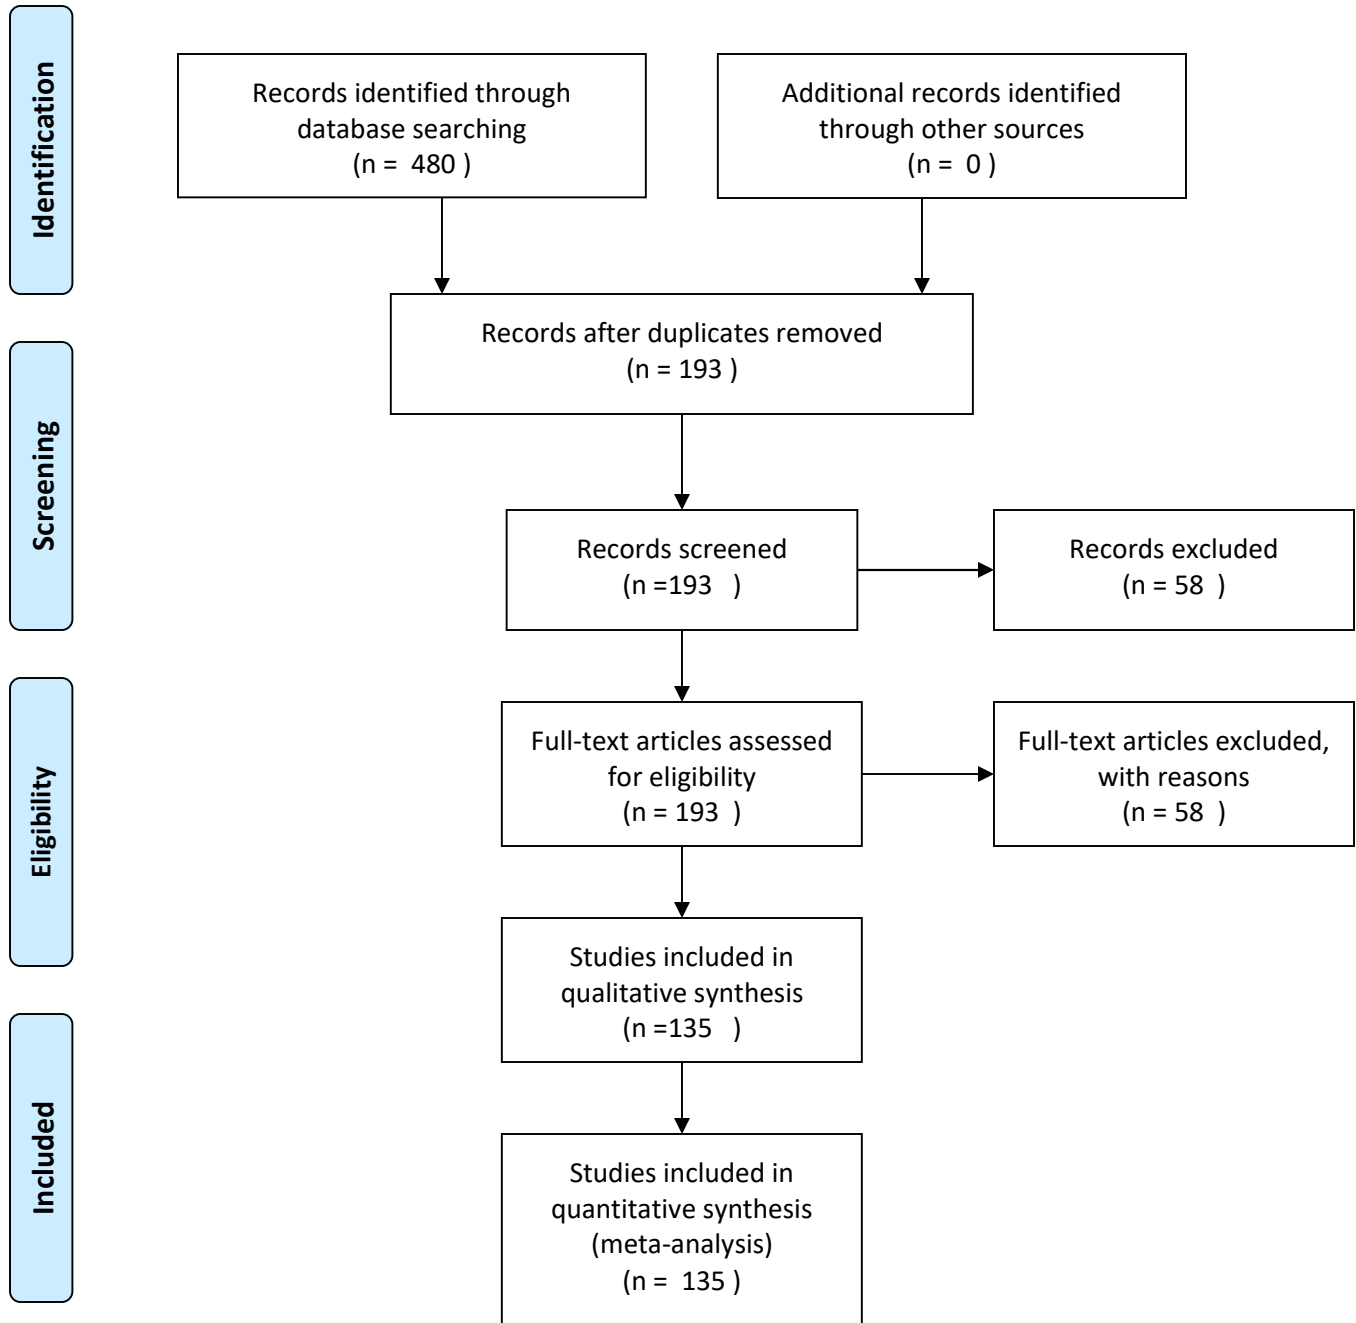

From: Moher D, Liberati A, Tetzlaff J, Altman DG, The PRISMA Group (2009). Preferred Reporting Items for Systematic Reviews and Meta-Analyses: The PRISMA Statement. PLoS Med 6(7): e1000097. doi:10.1371/journal.pmed1000097

For more information, visit [www.prisma-statement.org](http://www.prisma-statement.org).
